# Supplementary material for: Nanoindentation of Aluminum Single Crystals: Experimental Study on Influencing Factors
Source: MDPI journal article supplement (doi:10.3390/ma12223688), 2019-11-08
Supplement: s1 [file s1]

# Nanoindentation of Aluminum Single Crystals: Experimental Study on Influencing Factors

Pavel Filippov <sup>1\*</sup> and Ursula Koch <sup>2</sup>

<sup>1</sup> Munich University of Applied Sciences, Munich, Germany; Department of Earth- and Environmental Science, Ludwig-Maximilian-University, Munich, Germany; pavel.filippov@hm.edu

<sup>2</sup> Munich University of Applied Sciences, Munich, Germany; u.koch@hm.edu

\* Correspondence: pavel.filippov@hm.edu; Tel.: +49(0)89-1265-3649

Received: 10 October 2019; Accepted: 6 November 2019; Published: 8 November 2019

**Keywords:** Nanoindentation; aluminum; single crystal, micromechanics

## 1. Supplementary material: Residual analysis

The residuals  $e$  are calculated as the difference of the measured value  $y$  and the modelled value  $y'$ :

$$e = y - y' \quad (1)$$

The respective residuals are calculated on the basis of data shown in Figure 8 ( $H_{IT}$ ) and Figure 9 ( $M$ ).

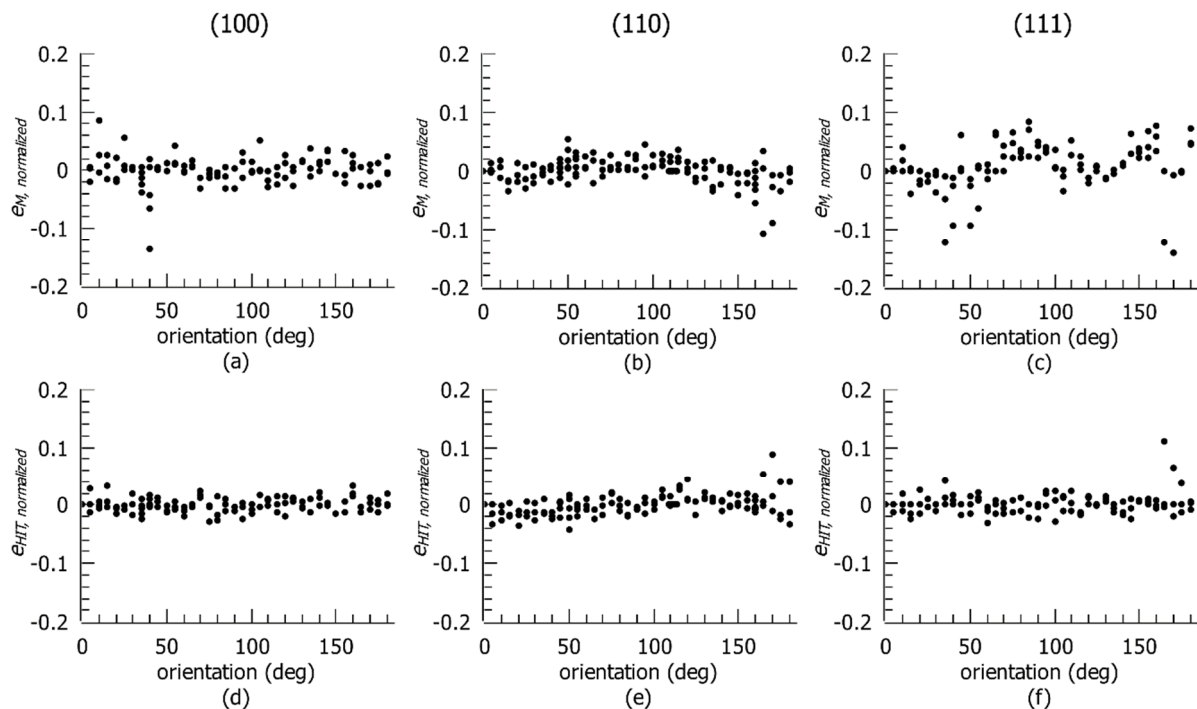

Figure S1 – Residual analysis of the fit to the azimuthal indenter orientation:  $e_{M,normalized}$ : a) (100)-orientation, (b) (110)-orientation and (c) (111)-orientation.  $e_{HIT,normalized}$ : a) (100)-orientation, (b) (110)-orientation and (c) (111)-orientation

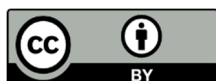

© 2019 by the authors. Submitted for possible open access publication under the terms and conditions of the Creative Commons Attribution (CC BY) license (<http://creativecommons.org/licenses/by/4.0/>).
